# Supplementary material for: Recombination locations and rates in beef cattle assessed from parent-offspring pairs
Source: PubMed Central journal article supplement (PMC4071795; doi:10.1186/1297-9686-46-34), 2014-05-29

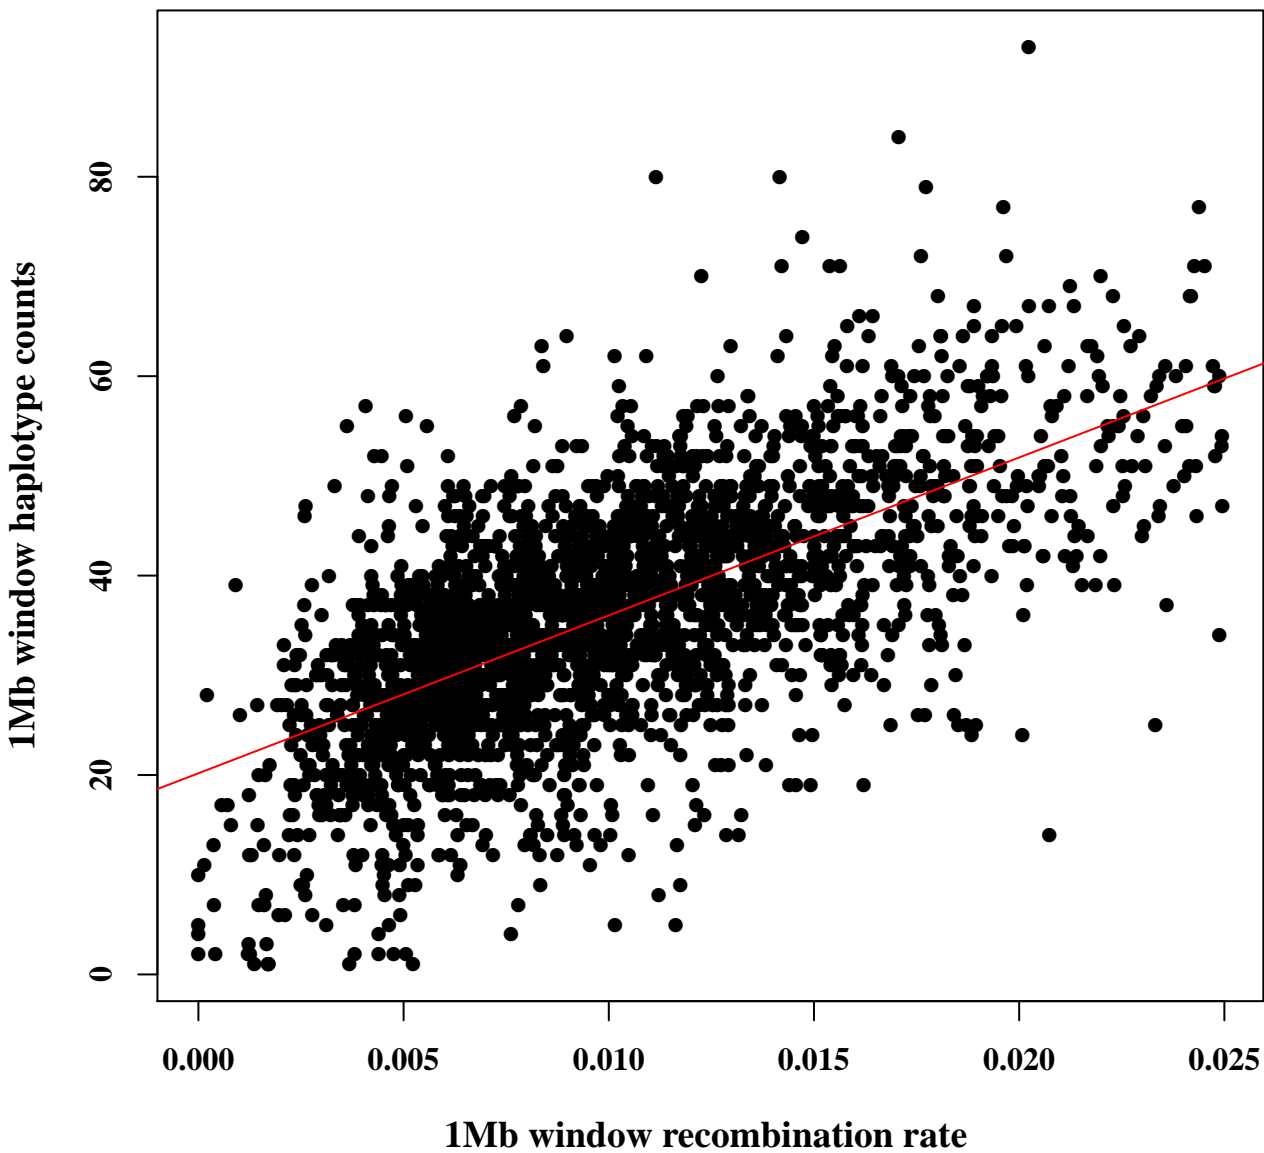

Supplement: 1297-9686-46-34-S2.pdf [file 1297-9686-46-34-S2.pdf]
